# Supplementary material
Source: Springer Nature journal article supplement (https://www.springermedizin.de/resource/supplementary/12936_2011_1723_MOESM5_ESM.pdf/9541628)

### Kisumu lab strain

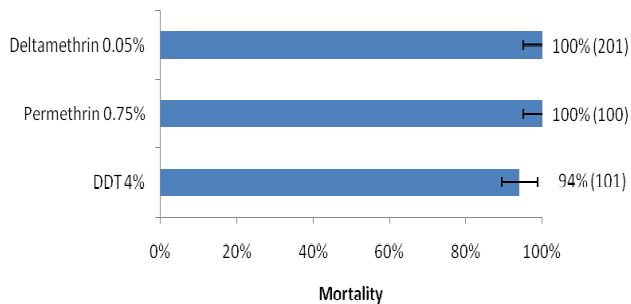

### Yaoundé Lab Strain

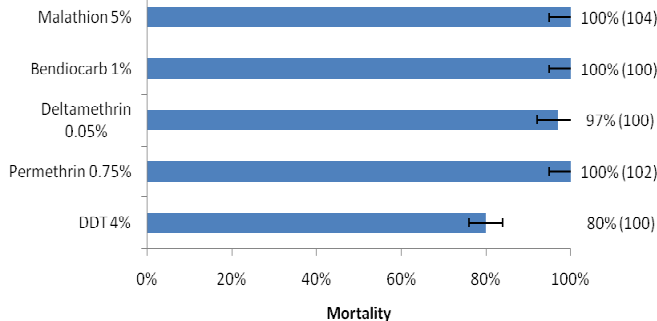

■ Douala  
■ Yaoundé

### DDT 4%

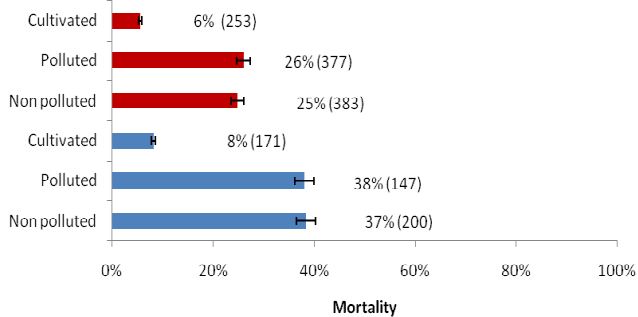

■ Douala  
■ Yaoundé

### Permethrine 0.75%

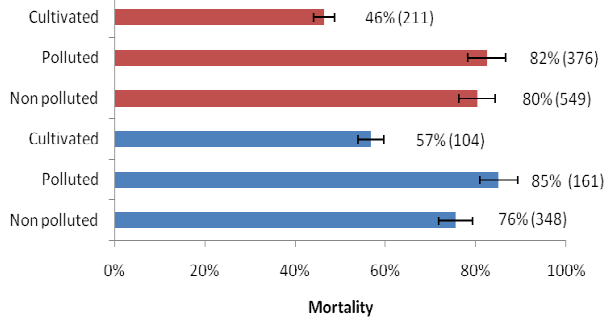

■ Douala  
■ Yaoundé

### Deltamethrine 0.05%

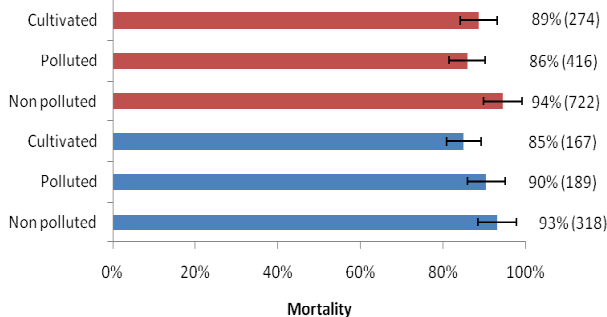

■ Douala  
■ Yaoundé

### Bendiocarb 0.1%

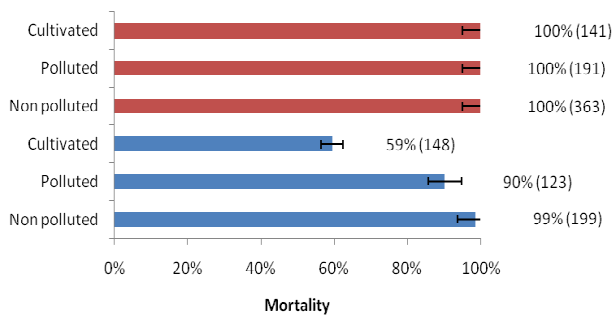

■ Douala  
■ Yaoundé

### Malathion 5%

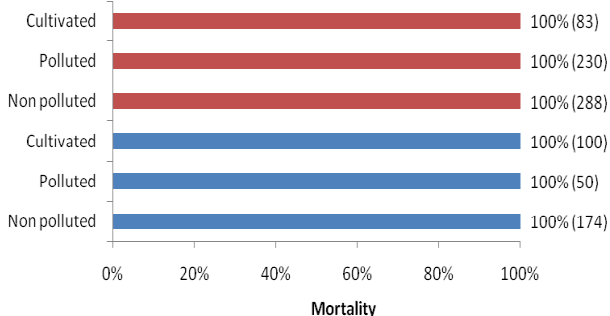

Supplement: MOESM5 [file 9541628]
